# Supplementary material for: In Vitro Photodynamic Effects of the Inclusion Nanocomplexes of Glucan and Chlorin e6 on Atherogenic Foam Cells
Source: MDPI journal article supplement (doi:10.3390/ijms22010177), 2020-12-26
Supplement: s1 [file s1]

## *Supplementary Materials*

### **In Vitro Photodynamic Effects of the Inclusion Nanocomplexes of Glucan and Chlorin e6 on Atherogenic Foam Cells**

**Jae Won Ahn<sup>†</sup>, Jin Hyuk Kim<sup>†</sup> and Kyeongsoon Park<sup>\*</sup>**

Department of Systems Biotechnology, Chung-Ang University, Anseong, Gyeonggi 17546, Korea;  
pinkymonkey1@naver.com (J.W.A); wlsgr0524@naver.com (J.H.K)

<sup>\*</sup> Correspondence: kspark1223@cau.ac.kr; Tel.: +82-031-670-3357

<sup>†</sup> These authors contributed equally to this work.

#### **Particle sizes of granulated Glu**

To prepare granulated Glu, 1 mg of Glu was dissolved in DMSO (0.4 mL) by vortexing for 10 min. Glu solution was added drop-by-drop into 1 mL of deionized water and sonicated for 5 min. Then, the particle sizes of granulated Glu were analyzed with a particle size analyzer (SZ-100, HORIBA, Kyoto, Japan). The determined mean sizes of granulated Glu were  $488 \pm 75.6$  nm. But, polydispersity index and Z-average size of granulated Glu were not determined.

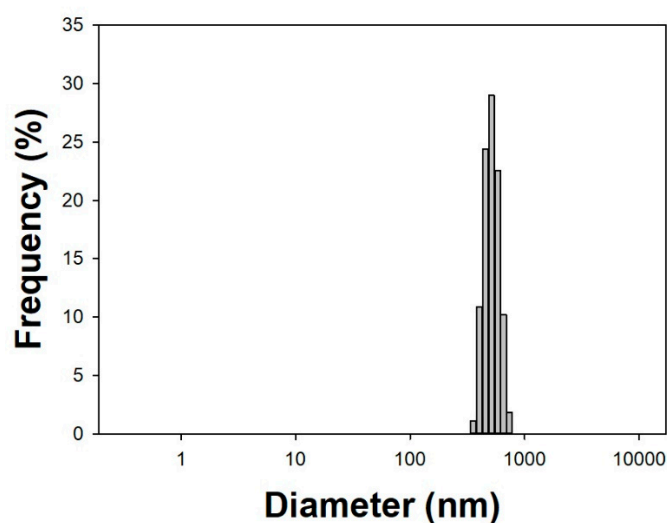

**Figure S1.** Particle size distribution of granulated Glu.

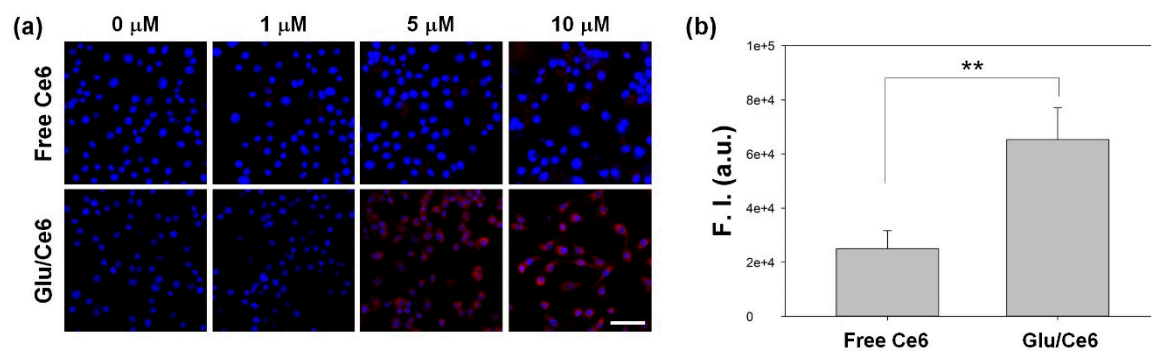

**Figure S2.** (a) Intracellular uptake of free Ce6 and Glu/Ce6 against foam cells. Scale bar: 50  $\mu\text{m}$ . (b) Quantitative comparison of cellular uptake between free Ce6 (equiv. 5  $\mu\text{M}$  Ce6) and Glu/Ce6 (equiv. 5  $\mu\text{M}$  Ce6) against atherogenic foam cells.  $**P < 0.01$
